# Supplementary material for: Multivariate image analysis-thin layer chromatography (MIA-TLC) for simultaneous determination of co-eluting components
Source: Royal Society of Chemistry journal article supplement (doi:10.1039/c0an00078g), 2010-01-01
Supplement: c0an00078g.pdf [file c0an00078g.pdf]

Multivariate image analysis-thin layer chromatography (MIA-TLC) for simultaneous determination of co-eluting components

Bahram Hemmateenejad, <sup>\*ab</sup> Nabiollah Mobaraki,<sup>a</sup> Fatemeh Shakerizadeh-Shirazi,<sup>a</sup> Ramin Miri<sup>b</sup>

<sup>a</sup>*Department of Chemistry, Shiraz University, Shiraz, Iran*

<sup>b</sup>*Medicinal & Natural Products Chemistry Research Center, Shiraz University of Medical Sciences, Shiraz, Iran*

**Table S1** Calibration Set Composition

| MY (ng) | BG (ng) | CR (ng) |
|---------|---------|---------|
| 169     | 524     | 344     |
| 169     | 279     | 191     |
| 113     | 279     | 478     |
| 113     | 977     | 268     |
| 214     | 349     | 478     |
| 146     | 977     | 344     |
| 214     | 524     | 268     |
| 169     | 349     | 268     |
| 146     | 349     | 402     |
| 146     | 698     | 478     |
| 191     | 977     | 402     |
| 214     | 698     | 344     |
| 191     | 524     | 478     |
| 169     | 977     | 478     |
| 214     | 977     | 191     |
| 214     | 279     | 402     |
| 113     | 698     | 191     |
| 191     | 279     | 344     |
| 113     | 524     | 402     |
| 169     | 698     | 402     |
| 191     | 698     | 268     |

---

|     |     |     |
|-----|-----|-----|
| 191 | 349 | 191 |
| 146 | 279 | 268 |
| 113 | 349 | 344 |
| 146 | 524 | 191 |

---

**Table S2** Prediction Set Composition

---

| MY (ng) | BG (ng) | CR (ng) |
|---------|---------|---------|
| 135     | 838     | 325     |
| 158     | 454     | 287     |
| 180     | 838     | 382     |
| 203     | 628     | 325     |
| 180     | 558     | 440     |
| 158     | 838     | 440     |

---

**Table S3** Calibration set composition for nifedipine (NIF) and photodegraded product of nifedipine (P-NIF) (detection with UV=254 nm).

| <i>Sample no</i> | <i>NIF (<math>\mu\text{g}</math>)</i> | <i>P-NIF (<math>\mu\text{g}</math>)</i> |
|------------------|---------------------------------------|-----------------------------------------|
| 1                | 4.8                                   | 6.0                                     |
| 2                | 6.5                                   | 2.5                                     |
| 3                | 6.5                                   | 4.8                                     |
| 4                | 3.1                                   | 3.6                                     |
| 5                | 1.4                                   | 4.8                                     |
| 6                | 3.1                                   | 2.5                                     |
| 7                | 1.4                                   | 6.0                                     |
| 8                | 4.8                                   | 4.8                                     |

|    |     |     |
|----|-----|-----|
| 9  | 4.8 | 2.5 |
| 10 | 6.5 | 3.6 |
| 11 | 1.4 | 3.6 |
| 12 | 1.4 | 2.5 |
| 13 | 3.1 | 6.0 |
| 14 | 4.8 | 3.6 |
| 15 | 6.5 | 6.0 |
| 16 | 3.1 | 4.8 |

---

**Table S4** Prediction set composition, the predicted values obtained by the proposed PLS model and corresponding errors of prediction (REP)

| No | Actual     |              | Predicted ( $\mu\text{g}$ ) |              | REP (%)    |              |
|----|------------|--------------|-----------------------------|--------------|------------|--------------|
|    | <i>NIF</i> | <i>P-NIF</i> | <i>NIF</i>                  | <i>P-NIF</i> | <i>NIF</i> | <i>P-NIF</i> |
| 1  | 1.60       | 2.70         | 1.52                        | 2.81         | -5.00      | 4.07         |
| 2  | 2.20       | 4.00         | 2.13                        | 3.87         | -3.18      | -3.25        |
| 3  | 4.50       | 4.30         | 4.20                        | 4.70         | -6.67      | 9.30         |
| 4  | 5.30       | 5.00         | 5.65                        | 5.19         | 6.60       | 3.80         |
| 5  | 4.00       | 5.10         | 4.30                        | 5.40         | 7.50       | 5.88         |
| 6  | 3.40       | 3.00         | 3.60                        | 2.80         | 5.88       | -6.67        |
| 7  | 2.90       | 5.50         | 2.82                        | 5.90         | -2.76      | 7.27         |
| 8  | 4.90       | 3.80         | 4.60                        | 4.40         | -6.12      | 15.79        |
| 9  | 6.20       | 2.30         | 5.80                        | 2.51         | -6.45      | 9.13         |
| 10 | 2.50       | 3.40         | 2.70                        | 3.70         | 8.00       | 8.82         |

**a**

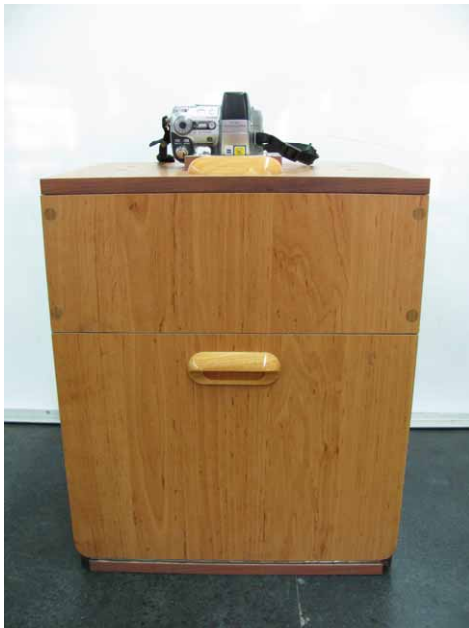

**b**

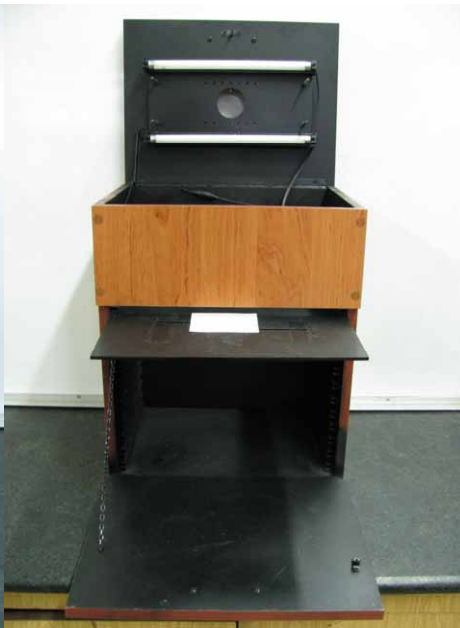

**c**

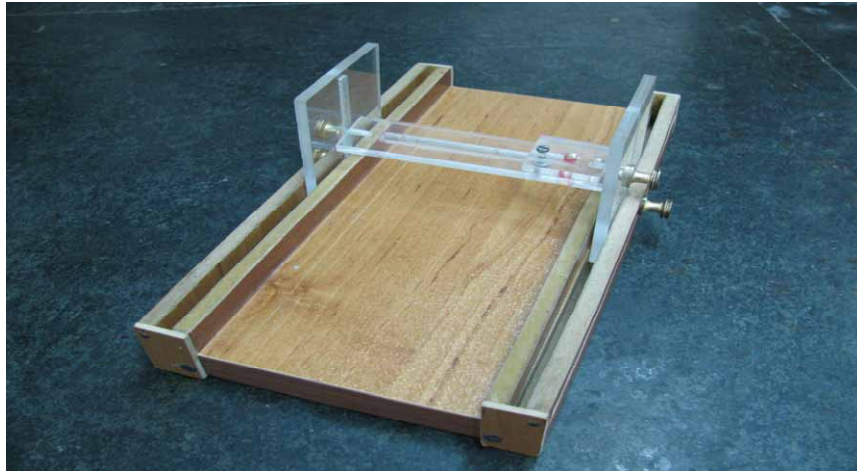

**Figure S1.** Photographs of the constructed imaging cabinet (a and b) and the spotting tool (c)

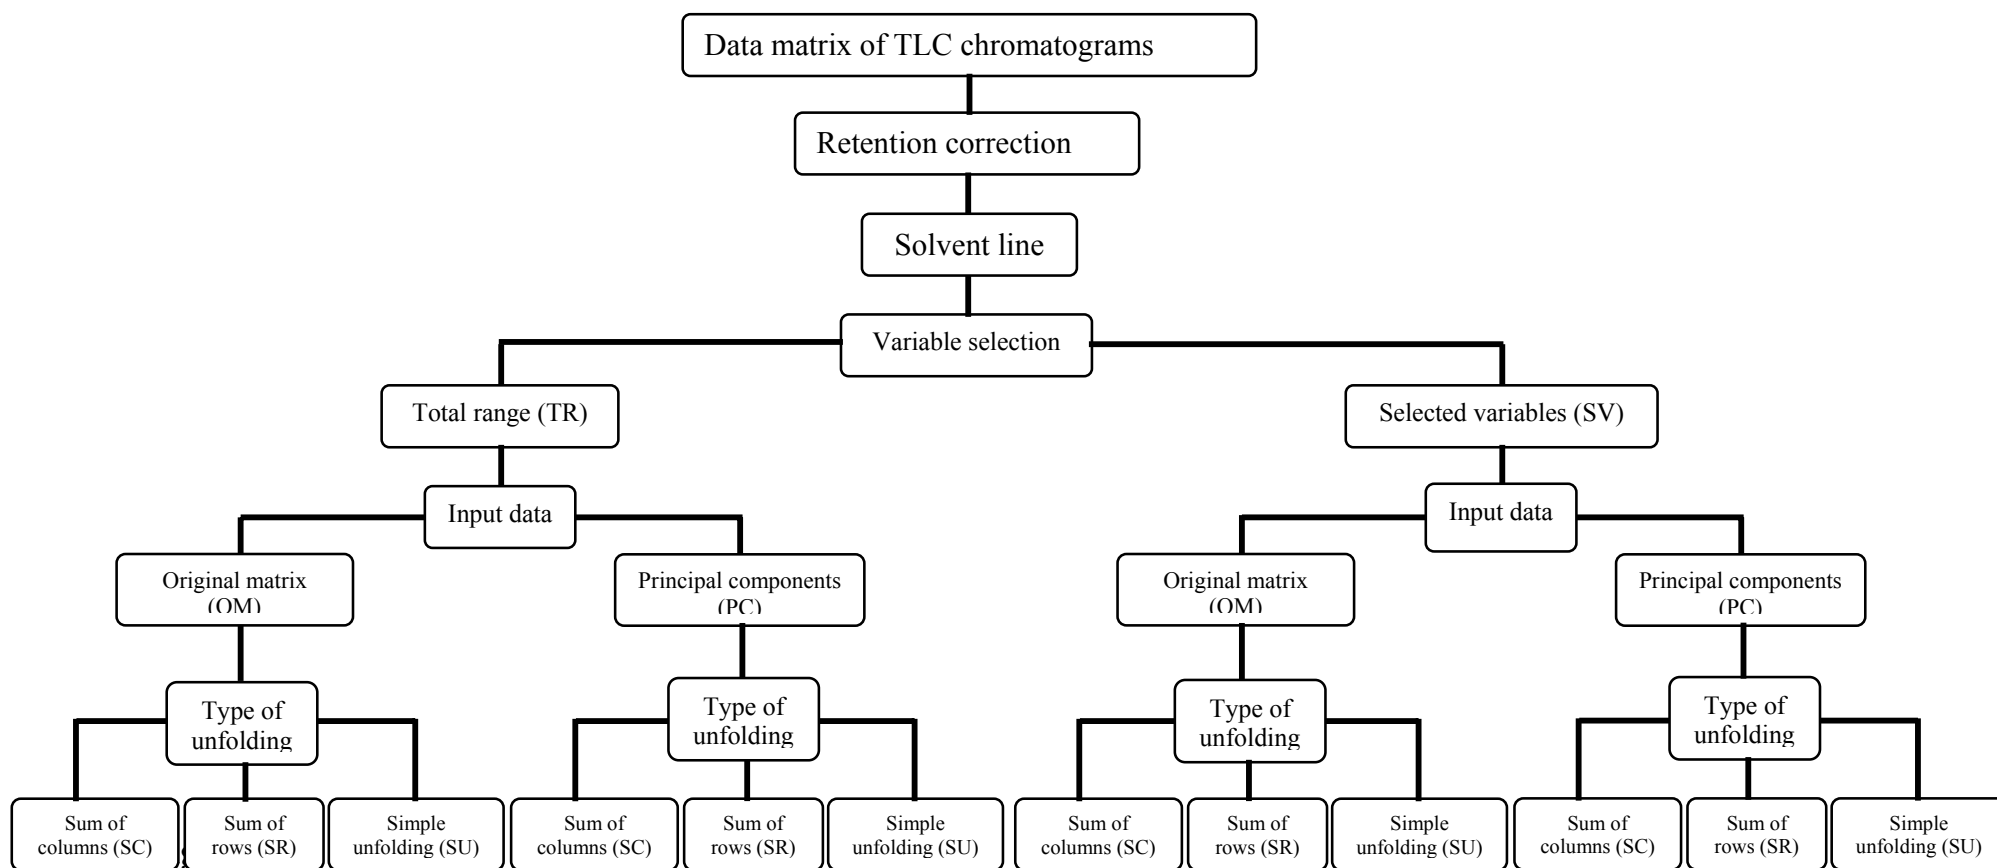

**Figure S2.** Schematic diagram of the data preparation for multivariate calibration

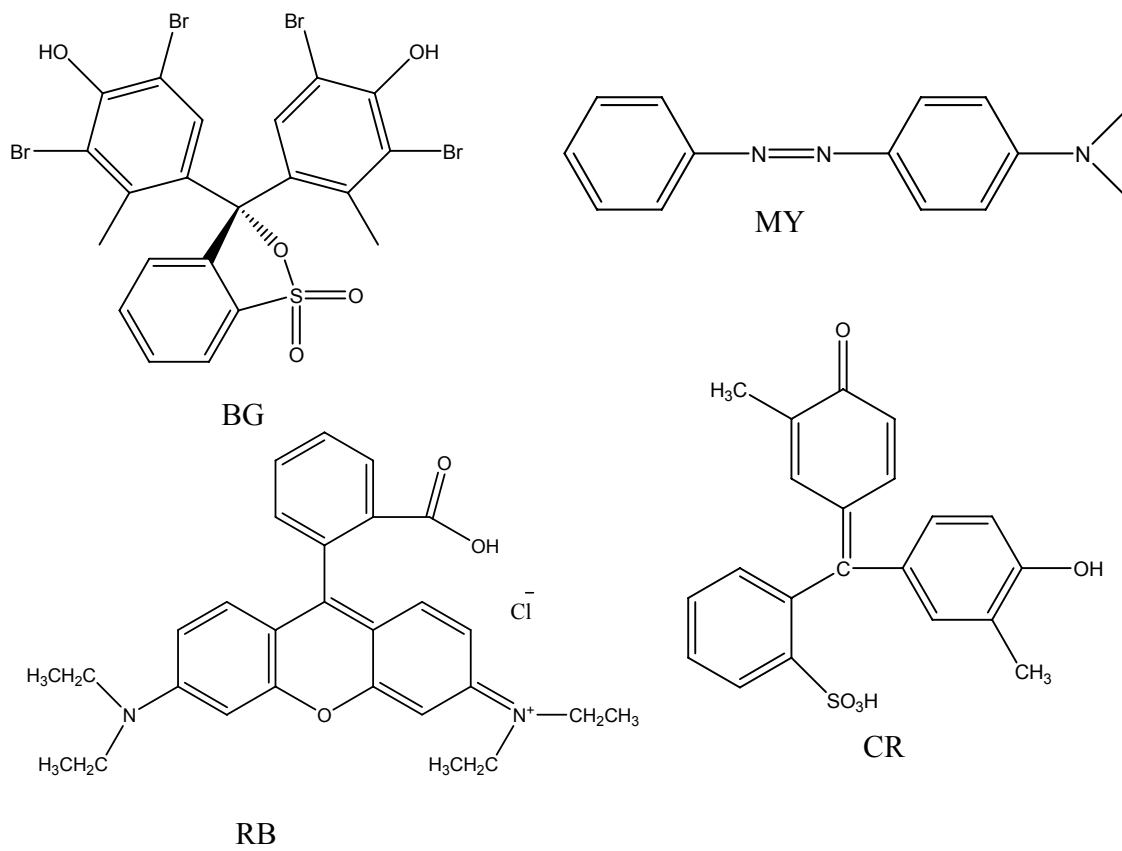

**Fig. S3.** Chemical structure of the indicators used in this study.



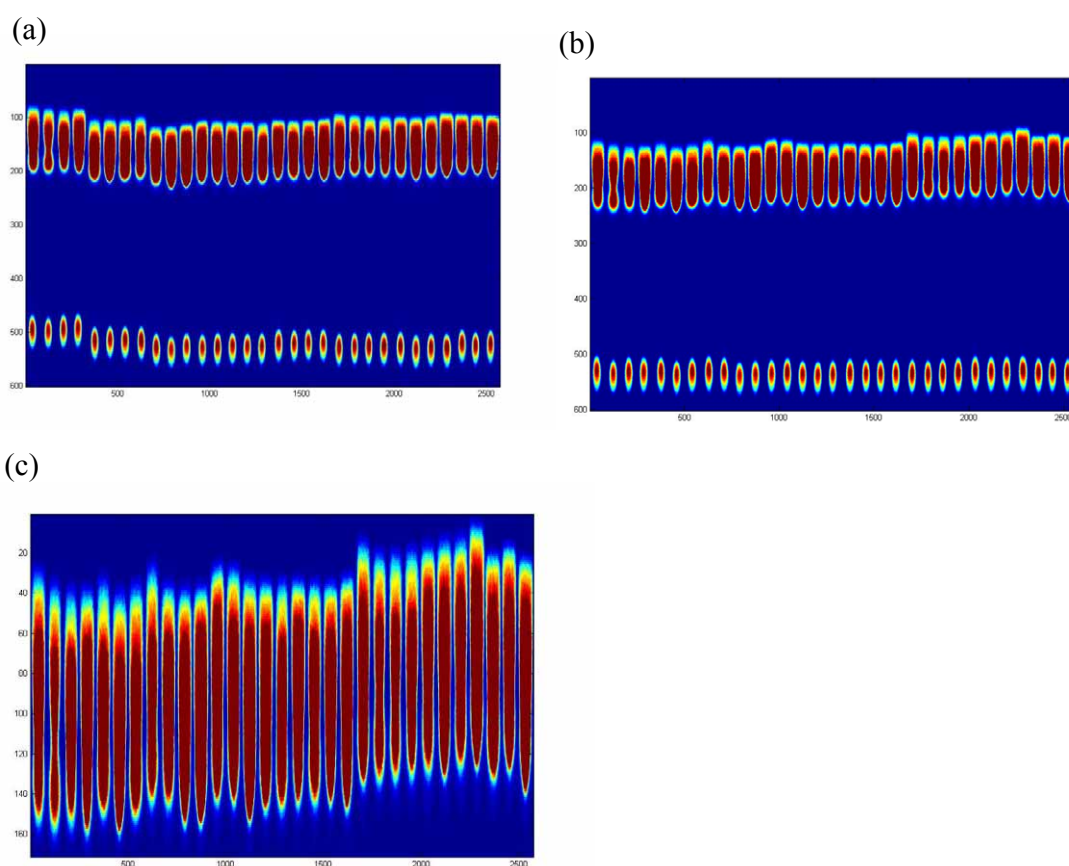

**Fig. S4.** Two-dimensional image of the TLC sheets (cut digitally beside each others) after development of different calibration and prediction sets: (a) before internal standard correction, (b) after internal standard correction and (c) after removing redundant parts.
